# Supplementary material for: RAC1b Acts Upstream of TAp73α-SMAD4 Signaling to Induce Biglycan Expression and Inhibit Basal and TGF-β-Driven Cell Motility in Human Pancreatic Cancer
Source: Preprints.org preprint supplement (doi:10.20944/preprints202309.1790.v1), 2023-09-26
Supplement: Supplementary file 1 [file supplementary]

## Supplementary Materials: RAC1b Acts Upstream of TAp73 $\alpha$ -SMAD4 Signaling to Induce Biglycan Expression and Inhibit Basal and TGF- $\beta$ -Driven Cell Motility in Human Pancreatic Cancer

Hendrik Ungefroren, Julissa Reimann, Björn Konukiewitz, Rüdiger Braun, Ulrich F. Wellner, Hendrik Lehnert and Jens-Uwe Marquardt

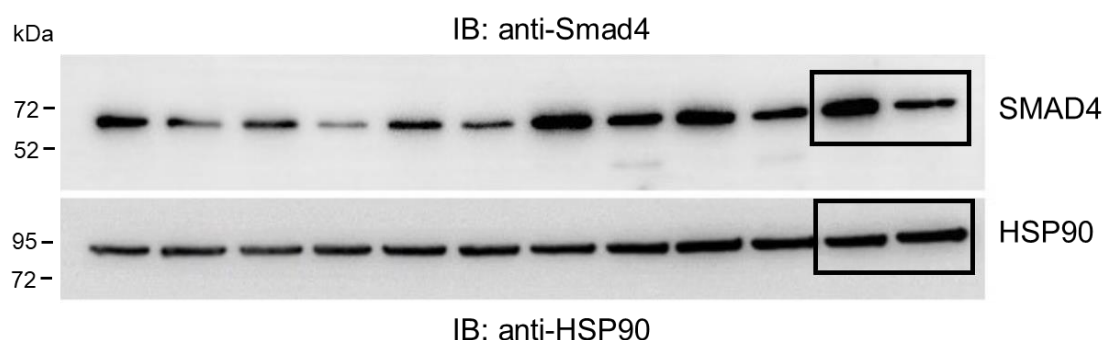

**Figure S1.** Uncropped blots from Figure 3A. The boxed bands indicate those in the main figure.

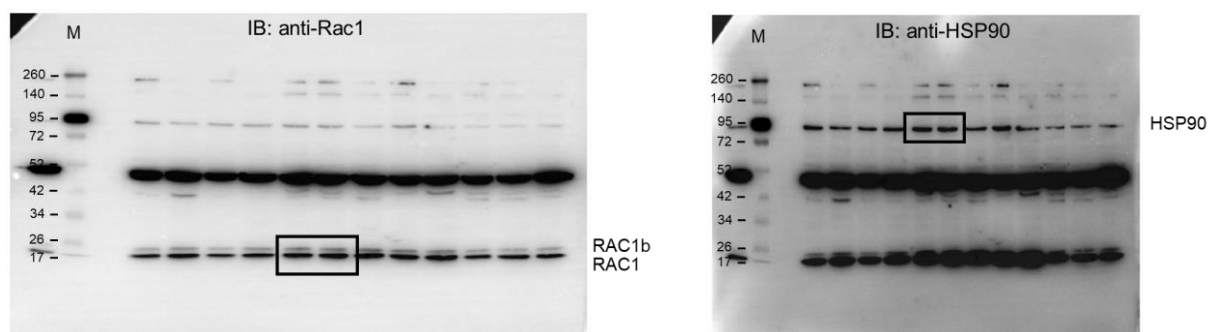

**Figure S2.** Uncropped blots from Figure 4A. The boxed bands indicate those in the main figure. Figure legend: M = molecular weight marker (SM1841, Fermentas/Thermo Fisher Scientific).

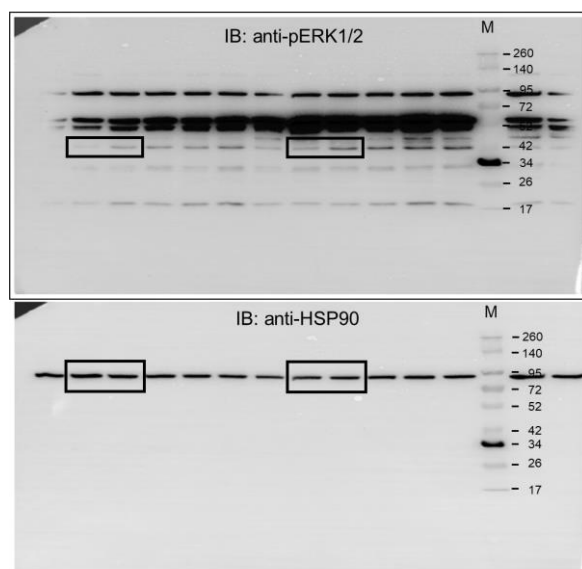

**Figure S3.** Uncropped blots from Figure 6C. The boxed bands indicate those in the main figure. Figure legend: M = molecular weight marker (SM1841, Fermentas/Thermo Fisher Scientific).
